# Supplementary material
Source: PubMed Central journal article supplement (PMC5021619)
Supplement: NIHMS810531-supplement-5.pdf [file NIHMS810531-supplement-5.pdf]

## **Inventory of Supplementary Materials**

### **Supplemental Figures**

**Figure S1 (related to Figures 1,2,3 and 4):** Nup188 and Nup93 are required for cilia in mammalian cells and *Xenopus*.

**Figure S2 (related to Figures 1, 2 and 3):** Nup188 overexpression specifically affects cardiac looping and cilia.

**Figure S3 (related to Figure 4):** Nup93/188 localize to the basal body and daughter centriole.

**Figure S4 (related to Figure 5):** Comparison of number of detections per cluster for both Nup93 and Nup188 in 2D-FPALM and fluorescence intensity in STED.

**Figure S5 (related to Figure 6):** Nup188 is found in multiple copies within evenly spaced clusters at the cilium base.

**Figure S6 (related to Figure 6 and movie S3):** Distribution of anti-Nup188 single molecule detections with reference to cylinder surface.

### **Movie Legends**

**Movie S1 (related to Figure S1D):** Knockdown of Nup93 alters gliding in *Xenopus* embryos.

**Movie S2 (related to Figure 6):** Nup188 surrounds the centrioles in evenly spaced clusters that organize into two barrel-like structures.

**Movie S3 (related to Figure 6):** 3D movies of W-4PiSMSN data of multiple barrel structures with fitted cylinders.

### **Supplemental Experimental Procedures**

**Frog husbandry**

**Microinjection of MOs and mRNA in *Xenopus* embryos**

**Cardiac looping in *Xenopus***

**Whole mount *In situ* hybridization**

**Gliding assays**

**Animal caps**

**Antibodies**

**Western blots**

**Cell culture and siRNA experiments**

**Statistical analysis**

**Immunostaining and SNAP labeling**

**Conventional fluorescence imaging and analysis**

**Super-resolution imaging and analysis: 2D FPALM**

**2D FPALM image analysis**

**W-4PiSMSN (3D) acquisition**

**W-4PiSMSN (3D) analysis**

**STED Microscopy imaging and image analysis**

**Table S1**

### **Supplementary References**
